# Supplementary material for: Gender Differences in Non-Persistence with Angiotensin-Converting Enzyme Inhibitors and Angiotensin Receptor Blockers among Older Hypertensive Patients with Peripheral Arterial Disease
Source: MDPI journal article supplement (doi:10.3390/biomedicines10071479), 2022-06-22
Supplement: s1 [file s1]

**Supplementary Table S1.** Sensitivity analysis of the effect of different lengths of treatment gap period defining non-persistence on the proportion of non-persistent patients.

|                        | Treatment gap to define non-persistence (months) |             |             |             |             |             |             |
|------------------------|--------------------------------------------------|-------------|-------------|-------------|-------------|-------------|-------------|
|                        | 1                                                | 2           | 3           | 4           | 5           | 6           | 12          |
| The whole study cohort |                                                  |             |             |             |             |             |             |
| (n = 7080)             |                                                  |             |             |             |             |             |             |
| 1st year               | 2224 (31.4)                                      | 1395 (19.7) | 1034 (14.6) | 820 (11.6)  | 721 (10.2)  | 664 (9.4)   | 488 (6.9)   |
| 2nd year               | 646 (9.1)                                        | 579 (8.2)   | 498 (7.0)   | 455 (6.4)   | 400 (5.7)   | 365 (5.2)   | 313 (4.4)   |
| 3rd year               | 309 (4.4)                                        | 342 (4.8)   | 323 (4.6)   | 300 (4.2)   | 283 (4.0)   | 272 (3.8)   | 239 (3.4)   |
| 4th year               | 192 (2.7)                                        | 236 (3.3)   | 241 (3.4)   | 245 (3.5)   | 243 (3.4)   | 220 (3.1)   | 194 (2.7)   |
| 5th year               | 141 (2.0)                                        | 180 (2.6)   | 174 (2.5)   | 149 (2.1)   | 134 (1.9)   | 121 (1.7)   | 15 (0.2)    |
| Total                  | 3512 (49.6)                                      | 2732 (38.6) | 2270 (32.1) | 1969 (27.8) | 1781 (25.2) | 1642 (23.2) | 1249 (17.6) |
| Males (n = 3075)       |                                                  |             |             |             |             |             |             |
| 1st year               | 935 (30.4)                                       | 574 (18.7)  | 420 (13.6)  | 338 (11.0)  | 300 (9.8)   | 274 (8.9)   | 197 (6.4)   |
| 2nd year               | 287 (9.3)                                        | 231 (7.5)   | 200 (6.5)   | 183 (6.0)   | 160 (5.2)   | 143 (4.6)   | 124 (4.0)   |
| 3rd year               | 127 (4.1)                                        | 145 (4.7)   | 131 (4.3)   | 126 (4.1)   | 124 (4.0)   | 119 (3.9)   | 104 (3.4)   |
| 4th year               | 81 (2.7)                                         | 103 (3.4)   | 114 (3.7)   | 111 (3.6)   | 108 (3.5)   | 98 (3.2)    | 87 (2.8)    |
| 5th year               | 55 (1.8)                                         | 78 (2.5)    | 76 (2.5)    | 67 (2.1)    | 60 (2.0)    | 51 (1.7)    | 6 (0.2)     |
| Total                  | 1485 (48.3)                                      | 1131 (36.8) | 941 (30.6)  | 825 (26.8)  | 752 (24.5)  | 685 (22.3)  | 518 (16.8)  |
| Females (n = 4005)     |                                                  |             |             |             |             |             |             |
| 1st year               | 1289 (32.2)                                      | 821 (20.5)  | 614 (15.3)  | 482 (12.0)  | 421 (10.5)  | 390 (9.7)   | 291 (7.3)   |
| 2nd year               | 359 (9.0)                                        | 348 (8.7)   | 298 (7.4)   | 272 (6.8)   | 240 (6.0)   | 222 (5.5)   | 189 (4.7)   |
| 3rd year               | 182 (4.5)                                        | 197 (4.9)   | 192 (4.8)   | 174 (4.3)   | 159 (4.0)   | 153 (3.8)   | 135 (3.4)   |
| 4th year               | 111 (2.8)                                        | 133 (3.3)   | 127 (3.2)   | 134 (3.4)   | 135 (3.4)   | 122 (3.1)   | 107 (2.7)   |
| 5th year               | 86 (2.1)                                         | 102 (2.6)   | 98 (2.5)    | 82 (2.1)    | 74 (1.8)    | 70 (1.8)    | 9 (0.2)     |
| Total                  | 2027 (50.6)                                      | 1601 (40.0) | 1329 (33.2) | 1144 (28.6) | 1029 (25.7) | 957 (23.9)  | 731 (18.3)  |

Values represent the frequency of non-persistent patients, the percentages are provided in parentheses (% of n).
