# Supplementary material for: Gender Differences in Non-Persistence with Angiotensin-Converting Enzyme Inhibitors and Angiotensin Receptor Blockers among Older Hypertensive Patients with Peripheral Arterial Disease
Source: MDPI journal article supplement (doi:10.3390/biomedicines10071479), 2022-06-22
Supplement: s1 [file s1]

**Supplementary Table S2.** Multivariate analysis of the association between patient- and medication-related characteristics and the probability of non-persistence in the models with a 3-year follow-up period.

| Factor                                   | The whole study cohort<br>(n = 7080) | Males<br>(n = 3075)     | Females<br>(n = 4005)   |
|------------------------------------------|--------------------------------------|-------------------------|-------------------------|
| <i>Socio-demographic characteristics</i> |                                      |                         |                         |
| Age                                      | 1.00 (0.99–1.01)                     | 0.99 (0.98–1.01)        | 1.00 (0.99–1.02)        |
| Female sex                               | 1.09 (0.97–1.22)                     |                         |                         |
| University education                     | 0.91 (0.73–1.14)                     | 0.97 (0.75–1.25)        | 0.74 (0.46–1.18)        |
| Employed patients                        | 0.94 (0.73–1.21)                     | 0.87 (0.63–1.20)        | 1.04 (0.69–1.58)        |
| <i>History of CV events<sup>a</sup></i>  |                                      |                         |                         |
| History of ischemic stroke               | 1.09 (0.94–1.26)                     | 0.98 (0.78–1.23)        | 1.19 (0.99–1.44)        |
| History of TIA                           | 1.05 (0.85–1.30)                     | 1.07 (0.74–1.56)        | 1.02 (0.78–1.33)        |
| History of MI                            | 1.01 (0.80–1.28)                     | 1.17 (0.83–1.64)        | 0.89 (0.64–1.23)        |
| <i>Comorbid conditions</i>               |                                      |                         |                         |
| Number of comorbid conditions            | 1.02 (0.92–1.13)                     | 0.97 (0.83–1.13)        | 1.04 (0.90–1.20)        |
| Chronic heart failure                    | 1.08 (0.85–1.37)                     | <b>1.50 (1.03–2.18)</b> | 0.92 (0.67–1.26)        |
| Atrial fibrillation                      | 0.83 (0.67–1.03)                     | 0.97 (0.71–1.34)        | <b>0.72 (0.54–0.97)</b> |
| Diabetes mellitus                        | 0.86 (0.74–1.01)                     | <b>0.78 (0.61–0.98)</b> | 0.93 (0.75–1.14)        |
| Hypercholesterolemia                     | 1.00 (0.86–1.17)                     | 0.91 (0.71–1.16)        | 1.07 (0.87–1.32)        |
| Dementia                                 | 0.91 (0.72–1.15)                     | 1.07 (0.72–1.58)        | 0.86 (0.64–1.15)        |
| Depression                               | 1.09 (0.89–1.32)                     | 0.93 (0.63–1.37)        | 1.09 (0.86–1.39)        |
| Anxiety disorders                        | 0.96 (0.81–1.13)                     | 0.98 (0.74–1.29)        | 0.95 (0.77–1.17)        |
| Parkinson's disease                      | 0.99 (0.74–1.32)                     | 1.18 (0.73–1.92)        | 0.93 (0.65–1.33)        |
| Epilepsy                                 | 1.03 (0.74–1.45)                     | 1.21 (0.74–1.97)        | 0.90 (0.56–1.44)        |
| Bronchial asthma/COPD                    | 1.07 (0.90–1.28)                     | 1.02 (0.78–1.33)        | 1.11 (0.88–1.40)        |
| <i>ACEI/ARB-related characteristics</i>  |                                      |                         |                         |
| Initially administered ACEI/ARB          |                                      |                         |                         |
| Perindopril                              | 1.00                                 | 1.00                    | 1.00                    |
| Lisinopril                               | 0.96 (0.75–1.23)                     | 0.98 (0.67–1.44)        | 0.95 (0.69–1.31)        |
| Ramipril                                 | 0.92 (0.78–1.08)                     | <b>0.76 (0.59–0.97)</b> | 1.07 (0.86–1.33)        |
| Enalapril                                | <b>0.52 (0.28–0.94)</b>              | 0.54 (0.22–1.31)        | 0.51 (0.22–1.15)        |
| Spirapril                                | 1.31 (0.42–4.09)                     | 0.84 (0.12–6.05)        | 1.90 (0.47–7.72)        |
| Trandolapril                             | 0.89 (0.75–1.04)                     | 0.81 (0.63–1.03)        | 0.95 (0.77–1.18)        |
| Quinapril                                | 0.83 (0.67–1.03)                     | 0.69 (0.47–1.02)        | 0.92 (0.70–1.20)        |
| Imidapril                                | <b>1.68 (1.16–2.43)</b>              | 1.84 (0.99–3.41)        | <b>1.63 (1.02–2.61)</b> |
| Fosinopril                               | 0.86 (0.47–1.57)                     | 0.89 (0.33–2.40)        | 0.86 (0.40–1.82)        |
| Valsartan                                | <b>1.65 (1.24–2.20)</b>              | <b>1.57 (1.01–2.44)</b> | <b>1.72 (1.17–2.52)</b> |
| Losartan                                 | 0.70 (0.44–1.09)                     | 0.84 (0.45–1.56)        | 0.57 (0.29–1.11)        |
| Telmisartan                              | 0.90 (0.58–1.41)                     | 0.75 (0.35–1.61)        | 0.98 (0.56–1.72)        |
| Candesartan                              | 0.85 (0.51–1.40)                     | 0.48 (0.15–1.51)        | 1.07 (0.61–1.88)        |
| Irbesartan                               | 2.02 (0.83–4.91)                     | 1.38 (0.34–5.65)        | 2.58 (0.81–8.22)        |
| New user of ACEI/ARB <sup>b</sup>        | <b>2.17 (1.80–2.62)</b>              | <b>1.90 (1.40–2.58)</b> | <b>2.46 (1.94–3.13)</b> |
| Patient's co-payment (EUR) <sup>c</sup>  | 0.99 (0.97–1.01)                     | 0.98 (0.96–1.01)        | 1.00 (0.97–1.02)        |
| General practitioner as index prescriber | <b>0.69 (0.61–0.79)</b>              | <b>0.74 (0.60–0.90)</b> | <b>0.66 (0.56–0.78)</b> |

(Table continued)

| Factor                                                | The whole study cohort<br>(n = 7080) | Males<br>(n = 3075)     | Females<br>(n = 4005)   |
|-------------------------------------------------------|--------------------------------------|-------------------------|-------------------------|
| <i>CV co-medication</i>                               |                                      |                         |                         |
| Number of medications                                 | <b>0.93 (0.90–0.95)</b>              | <b>0.93 (0.90–0.97)</b> | <b>0.92 (0.89–0.96)</b> |
| Number of CV medications                              | <b>1.13 (1.07–1.19)</b>              | <b>1.10 (1.01–1.20)</b> | <b>1.14 (1.07–1.22)</b> |
| Antiplatelet agents                                   | 0.93 (0.82–1.06)                     | 0.94 (0.76–1.15)        | 0.93 (0.79–1.10)        |
| Anticoagulants                                        | 1.00 (0.86–1.15)                     | 1.05 (0.83–1.33)        | 0.97 (0.80–1.17)        |
| Cardiac glycosides                                    | <b>0.79 (0.63–0.99)</b>              | 0.87 (0.60–1.25)        | 0.77 (0.58–1.02)        |
| Antiarrhythmic agents                                 | 1.00 (0.79–1.25)                     | 1.01 (0.72–1.43)        | 1.03 (0.76–1.39)        |
| Beta-blockers                                         | <b>0.77 (0.66–0.90)</b>              | <b>0.67 (0.51–0.89)</b> | 0.83 (0.68–1.01)        |
| Thiazide diuretics                                    | <b>0.80 (0.69–0.93)</b>              | <b>0.71 (0.55–0.92)</b> | 0.84 (0.70–1.02)        |
| Loop diuretics                                        | 0.97 (0.82–1.14)                     | 0.95 (0.72–1.26)        | 0.96 (0.78–1.18)        |
| Mineralocorticoid receptor antagonists                | 0.95 (0.75–1.20)                     | 0.71 (0.48–1.05)        | 1.18 (0.88–1.59)        |
| Calcium channel blockers                              | <b>0.78 (0.68–0.90)</b>              | <b>0.73 (0.57–0.92)</b> | <b>0.82 (0.69–0.98)</b> |
| Statins                                               | 1.06 (0.93–1.21)                     | 1.03 (0.84–1.26)        | 1.10 (0.92–1.30)        |
| Lipid lowering agents other than statins <sup>d</sup> | 1.10 (0.91–1.33)                     | 1.07 (0.78–1.46)        | 1.10 (0.86–1.41)        |

Values represent hazard ratios (95% confidence intervals). In the case of statistical significance ( $p < 0.05$ ), the values are expressed in bold. CV – cardiovascular; TIA – transient ischemic attack; MI – myocardial infarction; COPD – chronic obstructive pulmonary disease; ACEI – angiotensin-converting enzyme inhibitor; ARB – angiotensin receptor blocker. <sup>a</sup> The time period covered by “history” – 5 years before the index date of this study. <sup>b</sup> New user of ACEIs/ARBs – patient in whom ACEI/ARB treatment was initiated in association with the diagnosis of peripheral arterial disease. <sup>c</sup> Co-payment – calculated as the cost of ACEI/ARB treatment paid by the patient per month. <sup>d</sup> Lipid lowering agents other than statins – ezetimibe and fibrates.
